# Supplementary material for: Study of Complexes of Tannic Acid with Fe(III) and Fe(II)
Source: J Anal Methods Chem. 2019 Feb 3;2019:3894571. doi: 10.1155/2019/3894571 (PMC6378047; doi:10.1155/2019/3894571)
Supplement: Supplementary Materials — Figure 1S: using the tannic acid test paper to identify 1.000 × 10−2 mol/L Fe3+ solution (a), 1.000 × 10−3 mol/L Fe3+ solution (b), 1.000 × 10−4 mol/L Fe3+ solution (c), 1.000 × 10−5 mol/L Fe3+ solution (d), 5.000 × 10−6 mol/L Fe3+ solution (e), and 1.000 × 10−6 mol/L Fe3+ solution (f), respectively. Figure 2S: using the tannic acid test paper to identify 1.000 × 10−2 mol/L Fe2+ solution (a), 1.000 × 10−3 mol/L Fe2+ solution (b), 1.000 × 10−4 mol/L Fe2+ solution (c), and 1.000 × 10−5 mol/L Fe2+ solution (d), respectively. [file 3894571.f1.doc]

**Supporting Information**

Study of Complexes Tannic Acid with Fe(Ⅲ) and Fe(Ⅱ)

**Zhaofeng Fu, Rui Chen***

*College of Chemistry and Chemical Engineering, Yunnan Normal University, Kunming 650500, China*

E-mail: [rui_chen888@hotmail.com](mailto:rui_chen888@hotmail.com)


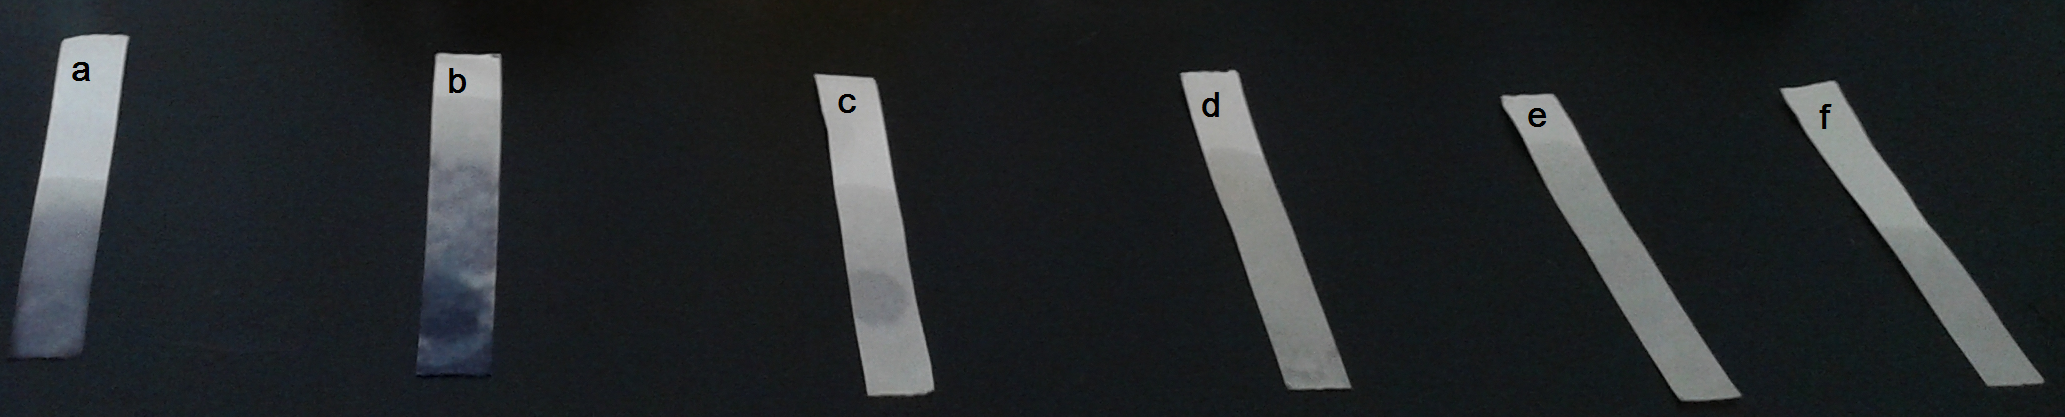


Figure 1S Using tannic acid test paper to identify 1.000×10-2 M Fe3+ solution (a), 1.000×10-3 M Fe3+ solution (b), 1.000×10-4 M Fe3+ solution (c), 1.000×10-5 M Fe3+ solution (d), 5.000×10-6 M Fe3+ solution (e), and 1.000×10-6 M Fe3+ solution (f), respectively.


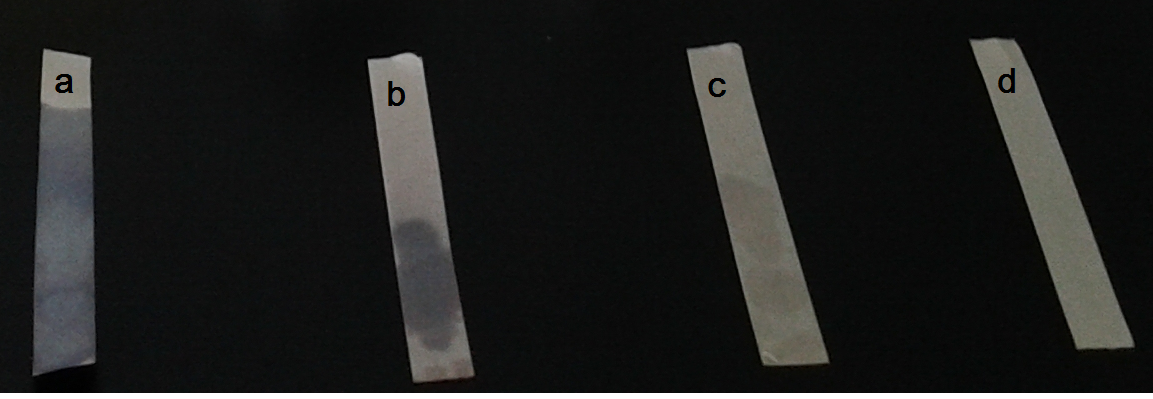


Figure 2S Using tannic acid test paper to identify 1.000×10-2 M Fe2+ solution (a), 1.000×10-3 M Fe2+ solution (b), 1.000×10-4 M Fe2+ solution (c), and 1.000×10-5 M Fe2+ solution (d), respectively.
